# Supplementary material for: Variability of spatial temporal gait parameters and center of pressure displacements during gait in elderly fallers and nonfallers: A 6-month prospective study
Source: PLoS One. 2017 Feb 27;12(2):e0171997. doi: 10.1371/journal.pone.0171997 (PMC5328253; doi:10.1371/journal.pone.0171997)
Supplement: S1 Dataset — (XLSX) [file pone.0171997.s001.xlsx]

## Sheet: Dataset
gender	age	height	weight	BMI (kg/m2)	fallers/nonfallers	number of falls	Tinetti balance	Tinetti gait	Tinetti total	ABC	FES	w_self-selected_LR_SD ML (mm)	w_self-selected_LR_SD AP (mm)	w_self-selected_MSt_SD ML (mm)	w_self-selected_MSt_SD AP (mm)	w_self-selected_TSt_SD ML (mm)	w_self-selected_TSt_SD AP (mm)	w_self-selected_PSw_SD ML (mm)	w_self-selected_PSw_AP (mm)	w_defined_LR_SD ML (mm)	w_defined_LR_SD AP (mm)	w_defined_MSt_SD ML (mm)	w_defined_MSt_SD AP (mm)	w_defined_TSt_SD ML (mm)	w_defined_TSt_SD AP (mm)	w_defined_PSw_SD ML (mm)	w_defined_PSw_AP (mm)	w_fast_LR_SD ML (mm)	w_fast_LR_SD AP (mm)	w_fast_MSt_SD ML (mm)	w_fast_MSt_SD AP (mm)	w_fast_TSt_SD ML (mm)	w_fast_TSt_SD AP (mm)	w_fast_PSw_SD ML (mm)	w_fast_PSw_AP (mm)	w_self-selected_step length (m)	w_self-selected_step width (m)	w_self-selected_step time (s)	w_self-selected_walking speed (m/s)	w_self-selected_CV of step length (%)	w_self-selected_CV of step width (%)	w_self-selected_CV of step time (%)	w_self-selected_CV of walking speed (%)	w_defined_step length (m)	w_defined_step width (m)	w_defined_step time (s)	w_defined_walking speed (m/s)	w_defined_CV of step length (%)	w_defined_CV of step width (%)
F	75.1233	170.1	113.912	39.47	N	0	16	12	28	78.13	24	4.17077	21.3424	0.123943	0.284804	0.0936643	0.629838	0.35636	2.1441	4.17077	21.3424	0.123943	0.284804	0.0936643	0.629838	0.35636	2.1441	5.35439	10.4071	0.0985416	0.731464	0.0981017	0.794364	0.481863	3.10588	0.588745	0.0923172	0.5	1.17795	1.12532	23.1361	2.12132	2.55936	0.588745	0.0923172	0.5	1.17795	1.12532	23.1361
F	62.4932	156.3	44.3171	18.01	N	0	16	12	28	96.88	20	2.28455	3.37726	0.299012	1.11973	0.25133	0.976074	2.83462	1.57616	1.42339	3.01972	0.237726	0.776863	0.172893	0.622815	1.02519	1.37906	2.64346	5.86783	0.45619	1.39687	0.199415	0.733914	0.789437	0.974234	0.655634	0.0678183	0.485	1.35344	3.28017	57.8197	3.4192	5.32369	0.602152	0.0585225	0.51375	1.17489	2.78227	59.7418
F	66.2192	167.5	70.7032	25.13	N	0	15.5	12	27.5	93.75	24	3.88434	4.89159	0.157833	0.406397	0.147174	0.717463	0.785341	2.07103	3.88434	4.89159	0.157833	0.406397	0.147174	0.717463	0.785341	2.07103	4.63204	12.6389	0.376264	2.29929	0.167927	1.12932	4.22902	5.44432	0.607263	0.0321171	0.54625	1.11268	1.99404	58.3624	2.62909	4.5584	0.607263	0.0321171	0.54625	1.11268	1.99404	58.3624
F	70.1836	164.4	59.9652	21.79	F	1	14	12	26	79.38	21	4.09211	8.41319	0.19055	0.386353	0.190649	0.672987	2.42822	2.00643	4.09211	8.41319	0.19055	0.386353	0.190649	0.672987	2.42822	2.00643	8.8792	8.75474	0.261214	1.16464	0.18982	1.15011	2.60015	5.96516	0.556504	0.120791	0.541667	1.02756	3.13999	5.54802	2.32303	3.07927	0.556504	0.120791	0.541667	1.02756	3.13999	5.54802
F	68.4575	152.6	71.1808	30.49	N	0	16	12	28	90	22	1.84754	3.64778	0.157117	0.340589	0.129605	0.383955	1.15255	5.57057	1.84754	3.64778	0.157117	0.340589	0.129605	0.383955	1.15255	5.57057	3.574	16.7256	0.218124	0.811712	0.306139	0.780327	1.90831	3.90178	0.543572	0.113355	0.4925	1.10404	4.73913	19.682	2.68604	4.90645	0.543572	0.113355	0.4925	1.10404	4.73913	19.682
F	59.6192	166	89.8655	32.62	N	0	16	11.5	27.5	90.63	20	1.90172	2.08103	0.0725668	0.597963	0.0995112	0.514779	0.370902	1.08961	1.43105	2.68922	0.0623868	0.463225	0.0810367	0.390937	0.514401	1.11107	2.49927	6.28245	0.111399	0.9732	0.134331	0.701639	0.430875	0.971796	0.623467	0.128224	0.562	1.11151	3.55975	19.1154	5.82044	5.15568	0.601784	0.121221	0.558333	1.07873	7.88195	22.8707
F	62.0438	163.7	62.8346	23.43	N	0	15.5	12	27.5	96.25	18	3.87347	6.21331	0.137568	0.273515	0.141762	0.68082	0.987247	3.04122	3.87347	6.21331	0.137568	0.273515	0.141762	0.68082	0.987247	3.04122	3.57009	4.45778	0.220072	0.821975	0.140082	0.3902	0.826077	2.42937	0.62026	0.0682464	0.54375	1.14099	1.33681	44.9807	2.17279	1.94918	0.62026	0.0682464	0.54375	1.14099	1.33681	44.9807
F	78.3178	158.8	67.8871	26.81	F	3	16	12	28	93.75	18	2.49689	5.59275	0.153501	0.241739	0.154431	0.502101	0.939165	1.78937	2.57264	5.24178	0.181847	0.379679	0.153467	0.567738	2.19316	7.73319	2.6989	8.38526	0.213368	0.670267	0.161057	0.656752	0.943598	2.26893	0.467752	0.102864	0.56	0.837048	3.37551	20.8338	4.05898	7.17278	0.548326	0.102569	0.49	1.11944	3.84115	23.3104
F	63.0521	170.3	62.848	21.55	N	0	16	12	28	95.63	18	3.18762	4.3414	0.218256	0.831091	0.153491	0.954469	0.596345	2.49794	3.46996	3.58916	0.155371	0.629817	0.181661	0.783581	0.449816	1.77761	4.5824	5.83872	0.225404	1.08623	0.141066	0.552942	0.653118	2.16159	0.669395	0.120901	0.502	1.33472	3.24913	14.7453	2.69109	5.10683	0.594136	0.0875527	0.52625	1.12915	1.74863	32.8703
F	64.4986	173.7	69.4462	22.94	N	0	16	12	28	95	19	6.00837	9.52834	0.124132	0.779698	0.117911	0.860866	1.10152	1.824	2.62729	4.64008	0.139255	0.475534	0.125181	0.585859	0.655101	1.16785	4.63514	10.3791	0.219934	2.71578	0.184494	1.54233	1.38883	3.89452	0.734907	0.0766778	0.50875	1.44906	3.91356	52.0094	4.83973	8.61847	0.655558	0.0497844	0.592	1.10804	3.72135	57.9981
F	61.5644	163	70.1159	26.27	F	1	16	12	28	95	18	2.2833	6.13535	0.168767	0.686029	0.144617	0.397584	0.985876	2.54086	2.57752	3.5494	0.145601	0.521528	0.120492	0.442657	2.81433	3.10368	6.51625	15.4814	0.205658	0.83362	0.189907	0.397772	1.14568	2.37072	0.645382	0.100695	0.464	1.3941	2.75389	28.9213	4.65986	6.53687	0.594037	0.0861331	0.55	1.08189	3.96492	21.9216
M	62.5836	185.2	83.0182	24.11	N	0	16	12	28	99.38	17	2.85518	8.18822	0.156284	0.522734	0.209261	0.51482	0.865491	2.58173	1.44065	4.78021	0.168209	0.481483	0.137089	0.71339	0.476655	1.86133	4.50517	11.8901	0.395105	3.19807	0.333068	1.79144	1.02047	3.89277	0.755602	0.0828094	0.529	1.42954	1.00593	28.724	2.94375	3.58313	0.662714	0.0935681	0.61	1.08688	2.34152	13.1336
F	62.1616	171.2	67.274	22.83	N	0	16	12	28	99.38	17	3.91677	4.15869	0.213697	0.278558	0.178089	0.649561	0.769836	1.75106	9.30008	11.0794	0.166743	0.42904	0.243102	0.834571	1.15222	2.83529	3.00193	17.4083	0.287268	0.763986	0.243051	0.593716	5.60516	37.2908	0.563623	0.0545169	0.604	0.933334	1.46708	28.9239	1.48084	2.22387	0.5586	0.065271	0.515	1.08442	4.67287	29.8469
F	66.4959	159.8	54.5148	21.22	F	1	16	12	28	92.5	23	2.78704	4.45191	0.149834	0.677564	0.345775	1.55143	0.945015	2.31723	2.64047	5.47979	0.192872	0.68777	0.356221	1.57135	1.13227	2.08608	2.82597	3.44608	0.437585	2.98778	0.382517	2.01172	1.43562	3.0913	0.592263	0.0924507	0.512	1.15733	3.79094	25.3014	4.23427	2.90784	0.591671	0.0884688	0.501	1.18295	1.37575	16.9271
F	71.9315	160.6	62.8816	24.27	N	0	16	12	28	86.88	21	3.21087	1.54069	0.225165	0.54554	0.113854	0.424193	0.719619	2.47118	3.21087	1.54069	0.225165	0.54554	0.113854	0.424193	0.719619	2.47118	4.50379	6.66964	0.270844	1.49047	0.164629	0.202234	1.17955	2.66963	0.610549	0.0624608	0.564	1.08418	2.7783	21.5612	5.14643	4.30143	0.610549	0.0624608	0.564	1.08418	2.7783	21.5612
F	63.2658	171.9	67.7099	22.57	N	0	16	12	28	85	21	2.72454	4.48197	0.11448	0.342978	0.10927	0.680634	0.295694	1.81028	2.72454	4.48197	0.11448	0.342978	0.10927	0.680634	0.295694	1.81028	3.61321	5.50816	0.139062	0.710718	0.143699	0.691441	0.8328	3.39594	0.601317	0.0933087	0.547	1.09999	2.5614	18.18	2.10436	4.21737	0.601317	0.0933087	0.547	1.09999	2.5614	18.18
F	62.1836	154	50.2162	21.04	N	0	16	12	28	63.75	26	2.98925	4.0644	0.145551	0.305924	0.186391	0.831125	1.19609	1.51081	2.63128	3.02674	0.137605	0.318707	0.178712	0.839822	1.09979	1.69372	3.53567	8.40956	0.177285	0.755731	0.228744	1.05262	1.72951	3.89535	0.517211	0.0691772	0.498	1.03945	2.35788	24.3617	2.61815	4.41772	0.520237	0.0721484	0.492	1.05769	1.4903	25.2209
M	72.5096	169.1	73.9936	25.74	N	0	16	12	28	93.75	17	3.91452	7.78902	0.228611	0.396772	0.193603	0.568059	0.909777	2.97324	1.51856	4.49314	0.143645	0.375432	0.158228	0.582707	0.590667	1.98348	2.11797	2.28773	0.267042	1.04945	0.188754	0.806917	1.51638	4.47704	0.536813	0.119984	0.542	0.99198	1.99522	16.1677	3.72447	5.41103	0.553532	0.11257	0.505	1.09791	2.83321	15.429
F	66.9151	161.5	80.7651	30.94	N	0	13	10.5	23.5	79.38	26	2.79683	5.32231	0.154675	0.597688	0.154459	0.889149	1.03619	1.75469	2.79683	5.32231	0.154675	0.597688	0.154459	0.889149	1.03619	1.75469	2.36152	13.0467	0.173592	2.03382	0.15221	1.18651	0.583945	2.41386	0.580862	0.0948375	0.487	1.19533	1.72381	11.3853	5.16418	5.50605	0.580862	0.0948375	0.487	1.19533	1.72381	11.3853
F	75.0795	164	64.4357	23.9574	N	0	16	12	28	90.63	23	3.22824	5.90109	0.241501	0.405176	0.149352	0.574787	1.30498	2.65373	1.65629	3.80084	0.198572	0.376277	0.117181	0.377006	0.379824	1.37779	4.7649	9.67596	0.321004	0.631304	0.160154	0.742191	0.986172	2.96465	0.648879	0.125548	0.47	1.38153	2.76036	13.274	2.4949	4.29166	0.640086	0.130809	0.563	1.13734	3.48102	26.8532
F	63.9151	162.7	61.6969	23.12	N	0	16	12	28	83.13	27	2.19252	2.13921	0.198015	0.862137	0.188619	1.14298	0.634651	2.30797	1.6777	1.89103	0.158889	0.491545	0.153009	0.901716	0.556537	2.80526	2.81678	5.81606	0.229507	0.964933	0.181587	1.21889	0.758122	2.64712	0.638044	0.0712204	0.503	1.2696	2.48347	4.67045	3.0314	4.32816	0.584253	0.0915765	0.556	1.05338	3.65475	21.4075
F	65.137	152.2	66.132	28.49	F	1	16	12	28	98.13	18	2.85732	4.65953	0.219233	0.576	0.173554	0.615014	0.932983	2.72008	3.60408	3.10953	0.231966	0.615435	0.1892	0.670366	0.992978	3.22278	5.25699	10.8442	0.420824	1.41885	0.22061	0.681317	2.11031	5.29342	0.553303	0.105245	0.442	1.25323	2.90941	20.8891	3.05639	5.13489	0.547365	0.116464	0.443	1.23729	1.53324	14.7296
M	68.1123	161.4	69.5202	26.68	N	0	16	12	28	91.88	20	4.72375	7.6948	0.181871	0.375576	0.16119	0.478567	0.72989	1.8194	4.72375	7.6948	0.181871	0.375576	0.16119	0.478567	0.72989	1.8194	4.6516	6.38554	0.381665	1.6484	0.157733	0.831869	1.2413	4.2323	0.574262	0.101018	0.52625	1.09199	2.34381	15.3592	2.49877	4.18794	0.574262	0.101018	0.52625	1.09199	2.34381	15.3592
F	83.126	154.5	78.718	32.89	F	2	15	12	27	90	19	3.1376	5.46629	0.0971885	0.434091	0.0879337	0.518882	0.684657	1.45761	3.24475	5.22255	0.0992733	0.476074	0.0888398	0.525257	0.790165	1.56159	3.36274	7.21512	0.11336	0.82864	0.0788631	0.462462	0.922929	1.62887	0.576318	0.0700039	0.56	1.03047	2.21399	22.9158	3.51518	5.01882	0.583367	0.0667949	0.554	1.05344	3.08096	27.748
F	68.0548	167.6	103.039	36.7	N	0	16	11.5	27.5	91.25	20	1.15185	2.91294	0.0848288	0.270888	0.120347	0.611441	1.0903	2.7666	1.15185	2.91294	0.0848288	0.270888	0.120347	0.611441	1.0903	2.7666	3.01608	4.59409	0.124623	0.636445	0.107623	0.48437	0.64318	2.9035	0.5828	0.161633	0.49125	1.18836	1.72307	13.894	5.08057	4.67848	0.5828	0.161633	0.49125	1.18836	1.72307	13.894
M	71.811	179	87.4615	27.2967	N	0	16	12	28	75.63	24	2.2905	3.90238	0.0728587	0.263355	0.0608777	0.464386	0.837006	1.80928	3.0577	7.73629	0.0787943	0.369548	0.0753725	0.545437	0.717892	2.23144	3.39174	2.55529	0.184162	0.621302	0.0948307	0.485735	0.873546	3.33284	0.536633	0.131868	0.52	1.03255	1.79058	22.0611	3.39955	2.27645	0.55253	0.123191	0.468	1.18056	1.89654	22.6238
F	78.8	161.1	76.9982	29.63	F	1	16	12	28	91.88	33	2.31083	2.80811	0.108876	0.271669	0.100337	0.275149	0.454105	0.786116	2.31083	2.80811	0.108876	0.271669	0.100337	0.275149	0.454105	0.786116	2.64822	2.55555	0.168373	0.271944	0.0952361	0.332082	0.602905	1.58299	0.546336	0.0827297	0.501	1.09219	3.29067	21.6453	3.55659	6.06006	0.546336	0.0827297	0.501	1.09219	3.29067	21.6453
M	77.9753	171.1	79.4	27.12	N	0	14	12	26	80.63	21	0.770451	4.249	0.179436	0.367889	0.192279	0.826697	1.06218	1.3072	3.827	8.70094	0.200476	0.479261	0.23532	0.837634	1.46183	1.71183	3.43765	7.23817	0.266632	0.579053	0.294163	0.885922	1.84774	2.56114	0.544435	0.184313	0.577	0.944194	4.56079	12.7973	1.79692	5.88596	0.560427	0.167364	0.49	1.14496	3.55403	13.4848
M	65.6301	176.7	80.1561	25.53	F	1	16	12	28	85	26	2.60857	8.16736	0.26811	0.810036	0.0992173	0.258467	3.18223	21.5356	3.48136	10.5634	0.180425	0.511412	0.0669822	0.272652	0.85622	1.72754	4.45471	8.49575	0.256989	0.629831	0.110239	0.334172	1.0537	3.10462	0.780894	0.135677	0.505	1.54751	4.0789	15.1084	1.9802	5.99388	0.707711	0.121917	0.601667	1.17779	1.34706	20.0546
M	69.6274	181	87.2117	26.53	F	2	16	12	28	94.38	19	2.4087	4.96256	0.151146	0.457429	0.146434	0.41727	0.729017	2.32021	1.99396	4.75878	0.158277	0.443485	0.141945	0.457166	0.623057	2.31603	3.29432	7.1911	0.307026	0.809661	0.106765	0.35253	0.555943	3.28736	0.649066	0.100081	0.526	1.23563	3.65483	26.0034	2.72202	6.25945	0.639143	0.106252	0.53375	1.19812	3.03234	22.227
F	84.5589	153.1	55.7105	23.64	F	1	16	12	28	85.63	19	6.08515	10.6598	0.138356	0.334811	0.169226	0.76412	0.604231	1.80748	4.97058	7.63693	0.172198	0.502569	0.203304	0.839501	0.886298	2.0369	8.59967	13.7134	0.234741	0.888462	0.193683	1.05479	1.20555	2.36911	0.489162	0.0498944	0.566667	0.872417	5.4266	17.9693	10.5268	15.0114	0.508185	0.0672884	0.515	0.990167	2.46937	37.4232
F	59.7781	171.4	54.3124	18.31	N	0	16	12	28	88.13	25	3.9497	16.3574	0.156419	0.61618	0.114854	0.692366	1.23696	3.00654	4.20681	16.6449	0.185492	0.594461	0.136739	0.642916	1.43169	1.89265	13.6611	19.5763	0.186973	1.2434	0.162819	0.935596	1.25405	2.915	0.699786	0.0966004	0.52	1.35465	3.90975	18.3425	9.80581	8.8269	0.693852	0.0674535	0.525	1.33147	3.17859	46.184
F	76.1671	156	72.0395	29.59	N	0	16	12	28	86.88	22	1.87504	4.16248	0.188629	0.387156	0.169901	0.614966	1.74406	1.02811	1.87504	4.16248	0.188629	0.387156	0.169901	0.614966	1.74406	1.02811	9.09906	13.6487	0.149803	0.762599	0.150576	1.10412	2.98552	2.37696	0.587459	0.086366	0.512	1.15009	3.40984	15.8147	4.71387	7.05833	0.587459	0.086366	0.512	1.15009	3.40984	15.8147
F	68.9096	165.1	64.2992	23.48	N	0	16	12	28	70.63	26	3.02208	4.07479	0.216242	0.939459	0.167158	0.860171	0.946806	2.75957	2.93596	9.22475	0.130974	0.736623	0.126171	0.809125	1.65742	1.9657	8.48139	26.4592	0.290158	1.9085	0.211771	0.889587	2.87247	9.97091	0.61182	0.114535	0.453	1.35276	2.7737	10.1902	4.78576	4.92589	0.605144	0.135385	0.53625	1.13124	1.84292	23.4803
F	64.5233	162.3	88.4964	33.6	N	0	16	12	28	99.38	18	15.147	26.3371	0.144375	0.339904	0.114764	0.650953	0.582985	2.1792	15.147	26.3371	0.144375	0.339904	0.114764	0.650953	0.582985	2.1792	3.71036	4.73227	0.267517	0.905266	0.137288	0.4949	1.35073	2.52206	0.575778	0.0518079	0.516	1.11684	4.57277	55.0804	2.60008	6.08039	0.575778	0.0518079	0.516	1.11684	4.57277	55.0804
F	60.5616	160.5	62.3902	24.07	N	0	16	12	28	97.5	20	3.61661	5.44621	0.18293	0.408601	0.139796	0.48865	0.86717	1.89651	3.61661	5.44621	0.18293	0.408601	0.139796	0.48865	0.86717	1.89651	5.08857	7.7605	0.259202	1.04069	0.131824	0.355419	1.11801	2.12698	0.628001	0.0793812	0.544	1.1556	3.8066	40.3966	2.19436	5.92232	0.628001	0.0793812	0.544	1.1556	3.8066	40.3966
F	72.3781	166.1	64.0401	23.12	N	0	16	12	28	76.88	35	3.68672	4.66915	0.187342	0.631199	0.184234	0.824324	1.00255	2.27977	3.68672	4.66915	0.187342	0.631199	0.184234	0.824324	1.00255	2.27977	6.13732	7.65811	0.253221	1.71003	0.302335	1.15967	1.47123	3.12258	0.573908	0.0212705	0.526	1.09287	1.8528	93.2007	4.81893	4.61166	0.573908	0.0212705	0.526	1.09287	1.8528	93.2007
F	76.2658	155.1	70.5997	29.27	F	1	15	9.5	24.5	85.63	25	2.76102	4.23956	0.135515	0.251299	0.13283	0.370385	0.672894	1.01479	3.36522	3.90919	0.14261	0.395482	0.127295	0.503299	0.705181	1.56951	4.62883	3.0381	0.346429	0.630498	0.113661	0.574582	3.15425	7.04648	0.512969	0.113866	0.5525	0.930283	4.32371	33.8413	4.47941	8.7946	0.614743	0.0920534	0.531667	1.16566	5.53866	57.8458
F	71.8192	156.4	55.0695	22.36	N	0	16	12	28	100	16	6.69946	6.55642	0.151028	1.40837	0.147702	0.562489	2.47419	5.40165	4.68741	10.3917	0.148254	0.765287	0.15819	0.737291	1.29343	1.81762	6.39511	4.66291	0.247045	1.67836	0.249459	0.391269	1.7283	3.40706	0.675438	0.0767239	0.45125	1.49729	2.30405	37.098	1.39424	3.40969	0.607356	0.0514479	0.506667	1.19885	0.358665	8.05856
F	70.9041	150.6	86.6824	38.18	F	1	16	12	28	52.5	33	1.07868	2.48404	0.148116	0.301867	0.154832	0.409235	0.373886	1.44835	3.61458	8.61694	0.133493	0.352577	0.16935	0.463144	0.925499	1.8161	3.1207	4.072	0.206408	0.386296	0.148083	0.518926	0.781472	2.79099	0.528565	0.102602	0.553	0.958302	2.38582	13.6992	4.89417	6.93005	0.627867	0.106469	0.541	1.16293	3.23676	21.2765
F	74.6082	169.9	76.0897	26.26	F	1	16	12	28	96.25	19	5.68577	5.41725	0.19074	0.813809	0.204122	0.931417	0.829373	2.38916	2.18088	3.70485	0.156673	0.584705	0.158496	0.818497	0.66756	1.9476	3.82016	14.8773	0.342688	1.94888	0.230513	1.41879	2.58719	2.60882	0.642025	0.0488261	0.5	1.28436	1.58283	48.2367	2.16025	2.1151	0.588766	0.0660695	0.545	1.08111	4.23821	51.4735
F	62.1616	167.4	77.8408	27.73	N	0	16	12	28	87.5	25	2.74334	1.9554	0.135709	0.19204	0.135528	0.216508	0.643785	1.66769	2.14893	2.09858	0.168422	0.354748	0.116371	0.29933	0.432079	1.64012	3.79105	6.57924	0.194359	0.380551	0.148124	0.502478	1.16613	2.25225	0.547483	0.124352	0.558	0.982763	2.1751	14.68	3.727	5.67288	0.60939	0.108694	0.526	1.16022	2.97233	10.5466
M	70.7753	176.2	112.579	36.17	N	0	16	12	28	99.4	16	0.965255	1.20541	0.260789	0.335528	0.137893	0.378711	0.387588	1.48912	1.12493	1.37592	0.24476	0.323854	0.156381	0.411108	0.354267	1.41091	1.33963	3.0263	0.264184	0.784269	0.164829	0.555172	0.401447	2.3254	0.541105	0.123184	0.554	0.976733	4.31928	14.7825	3.15239	2.9241	0.542586	0.127927	0.546	0.993608	4.3706	12.0611
F	61.2438	157.1	74.4191	30.02	N	0	15.5	12	27.5	85	24	4.81325	5.59255	0.171356	0.712206	0.139733	0.59871	1.31015	2.74701	3.32847	6.03228	0.139497	0.498221	0.107686	0.515436	0.792553	1.37304	3.49915	7.76533	0.210888	1.62098	0.176183	0.855677	1.26107	2.45887	0.61848	0.0967778	0.46	1.34484	2.26948	19.2239	1.88266	2.75602	0.577226	0.0887233	0.522	1.10649	3.05782	11.3508
M	66.9699	168.6	100.831	35.28	N	0	16	12	28	96.87	20	2.36394	3.21838	0.132754	0.162783	0.234905	0.577536	0.769482	1.38884	3.33631	5.00357	0.156287	0.31002	0.259509	0.56904	0.615231	1.5167	4.70837	8.16664	0.212192	0.619526	0.282352	0.80098	0.837766	1.02469	0.517303	0.0893856	0.648	0.798251	5.59126	33.6346	1.85827	5.05458	0.591891	0.0903896	0.578	1.02544	0.911662	27.8298
F	80.7671	155.3	59.1311	24.38	N	0	16	12	28	86.88	20	5.1345	7.32816	0.197508	0.878953	0.202109	0.807472	1.74417	2.5425	4.58772	6.74822	0.18656	0.806365	0.199513	0.758642	1.62893	2.34863	6.2487	4.59531	0.228397	1.07333	0.216012	0.954862	1.71092	2.46892	0.543693	0.0725314	0.446	1.2206	4.08832	28.6837	2.79146	6.35224	0.534416	0.0726756	0.453	1.18143	3.60539	28.3591
F	84.2986	151.9	73.7565	31.77	N	0	12.5	12	24.5	67.5	27	1.81647	3.34958	0.128414	0.448912	0.102791	0.74913	0.60529	1.95773	1.81647	3.34958	0.128414	0.448912	0.102791	0.74913	0.60529	1.95773	3.9289	7.96371	0.278611	0.673808	0.101889	0.566995	0.695496	1.20289	0.521192	0.15057	0.465	1.1214	3.25545	13.5176	2.94474	3.70805	0.521192	0.15057	0.465	1.1214	3.25545	13.5176
F	77.1534	167.4	96.7974	34.54	N	0	16	12	28	56.88	25	0.751687	1.6388	0.0939673	0.234482	0.0706728	0.497391	0.338327	1.30228	1.69111	2.86778	0.166236	0.306404	0.0965788	0.549438	0.379795	1.58672	1.52467	3.25942	0.127335	0.410773	0.100176	0.584472	0.490291	1.97561	0.527773	0.117268	0.582	0.90708	1.36729	8.46432	1.78148	2.37188	0.569018	0.117096	0.508	1.12267	2.95433	11.7568
F	79.7425	166	70.8623	25.7158	N	0	16	12	28	68.75	29	1.80833	2.5599	0.189162	0.387721	0.150734	0.342218	0.539756	1.25407	1.95799	2.98392	0.205677	0.371629	0.133745	0.272682	0.600955	1.30714	3.56308	4.31252	0.211848	0.457985	0.182437	0.320302	0.668965	1.88135	0.593653	0.0879493	0.59	1.01006	3.99171	23.4525	7.38796	7.55397	0.59388	0.076498	0.57	1.04295	3.98429	27.6429
F	79.9644	166.9	94.6893	34.03	N	0	15.5	11	26.5	86.88	25	1.17401	3.9305	0.10306	0.189384	0.114824	0.29579	0.438484	0.910847	3.07359	5.16975	0.0852425	0.175091	0.0958619	0.30282	0.401282	1.25907	2.94047	6.85258	0.138659	0.644938	0.123428	0.584702	0.6981	1.89171	0.58899	0.0948194	0.588	1.0287	7.59113	18.0184	14.2365	23.3705	0.586336	0.100002	0.565	1.03833	3.80187	7.40359
F	75.2411	150	74.6654	33.1846	F	1	15	9.5	24.5	93.75	25	1.78833	3.70237	0.125635	0.211362	0.089016	0.337748	0.482791	0.822508	2.07503	3.13115	0.104037	0.329732	0.102924	0.46963	0.419222	1.13791	2.6363	2.81012	0.0983151	0.335292	0.115561	0.422714	0.376636	1.09027	0.501147	0.0967725	0.7	0.718108	1.91066	16.3921	6.85119	6.08293	0.543836	0.110508	0.485	1.12486	5.26495	10.2062
F	63.1151	160.3	79.2113	30.78	N	0	16	12	28	63.13	38	2.92162	6.04132	0.151987	0.492669	0.087557	0.287534	2.28673	10.3035	2.22615	7.26206	0.140736	0.465574	0.0822591	0.248242	0.72307	1.63954	3.09015	6.18508	0.146169	0.794581	0.09272	0.216559	0.858309	1.99958	0.595744	0.12144	0.4975	1.19772	2.58728	13.9468	1.74075	3.00206	0.584933	0.112868	0.50875	1.15418	4.09096	20.6718
M	64.4301	179	94.6946	29.46	N	0	16	12	28	95.63	22	3.99175	3.99582	0.133617	0.278537	0.130817	0.453297	0.74243	2.15023	3.99175	3.99582	0.133617	0.278537	0.130817	0.453297	0.74243	2.15023	4.35156	16.7798	0.190903	0.618381	0.129827	0.624235	2.61608	3.4003	0.665383	0.0955368	0.597	1.11476	2.34021	44.3625	1.92812	2.56685	0.665383	0.0955368	0.597	1.11476	2.34021	44.3625
F	75.9205	160	73.8055	28.8303	N	0	16	12	28	73.13	29	3.12637	11.126	0.169045	0.436768	0.131777	0.595413	0.58018	1.8432	1.72769	6.85353	0.130033	0.415204	0.127683	0.501052	0.480787	1.56643	3.65009	7.35569	0.229145	0.705634	0.136465	0.661138	1.03849	2.42798	0.575714	0.112805	0.476	1.20995	0.726901	16.9744	2.27726	2.23745	0.547009	0.105307	0.513333	1.06682	3.44912	28.2787
F	83.1479	162.9	81.4454	30.6	N	0	16	9	25	70	29	9.19752	4.49176	0.160828	0.384395	0.0917337	0.200215	0.811486	1.52213	9.19752	4.49176	0.160828	0.384395	0.0917337	0.200215	0.811486	1.52213	1.6188	3.97915	0.182265	0.410558	0.114855	0.260476	0.881371	2.21404	0.562055	0.121957	0.551	1.02159	2.36505	50.4019	3.59557	5.48599	0.562055	0.121957	0.551	1.02159	2.36505	50.4019
F	72.1041	155.6	68.8137	28.29	N	0	16	11	27	89.38	19	1.54866	3.82346	0.148513	0.551508	0.121827	0.558815	0.392889	1.86853	1.07217	2.95203	0.144845	0.536779	0.121616	0.73565	0.416656	1.85027	1.43073	4.29986	0.162259	0.582665	0.166832	0.664796	0.409491	2.42188	0.542413	0.105814	0.52375	1.03845	6.77422	12.1652	5.36506	9.37703	0.538816	0.108086	0.536	1.01005	6.09156	11.3349
F	72.5041	167	68.1492	24.27	N	0	16	12	28	82.5	32	2.3993	4.49141	0.131381	0.760916	0.125866	1.01328	0.614247	1.80398	2.61549	3.98772	0.101204	0.414967	0.112527	0.803059	0.637142	1.35702	3.53124	8.18943	0.243441	1.75738	0.200319	1.30413	0.575825	2.11795	0.662258	0.109456	0.487	1.3615	1.59501	28.6652	3.29503	4.66166	0.613225	0.124337	0.595	1.03391	1.23296	33.6667
F	66.611	146.6	54.3173	25.08	F	1	16	12	28	98.75	18	2.08101	3.8609	0.128311	0.391025	0.112684	0.418705	0.731196	1.83291	2.08101	3.8609	0.128311	0.391025	0.112684	0.418705	0.731196	1.83291	7.229	10.5928	0.183	1.3955	0.143576	0.787069	1.51223	2.77115	0.575024	0.0605537	0.467	1.23339	2.96685	18.453	3.90462	6.0423	0.575024	0.0605537	0.467	1.23339	2.96685	18.453
F	76.7945	160.8	75.8924	28.43	F	1	15	12	27	95	21	1.75043	4.58476	0.159833	0.310767	0.180479	0.480244	0.368509	1.63174	1.49918	3.32375	0.148262	0.259716	0.170922	0.460523	0.306541	1.2294	1.8561	3.95659	0.194828	0.425645	0.181876	0.51238	0.703972	2.16025	0.567801	0.159875	0.475	1.19614	6.2484	19.1683	3.15789	6.71879	0.559589	0.154972	0.482	1.1646	5.36628	19.9993
M	79.0356	173.5	90.5342	29.67	N	0	15	12	27	96.25	19	6.1933	4.53941	0.197799	0.538061	0.198181	0.80476	0.512074	2.42066	9.93968	14.025	0.182609	0.451208	0.178812	0.695569	0.542837	1.78777	2.73043	4.6769	0.282885	0.78331	0.169139	0.539131	0.50915	4.33789	0.610308	0.116532	0.479	1.27473	4.94285	28.7859	1.14347	5.94966	0.602274	0.0965762	0.507	1.19123	1.79437	28.1774
F	67.9151	167.9	84.4952	29.8	N	0	15	12	27	90.63	22	3.73615	7.93021	0.14973	0.31656	0.125974	0.385923	1.6323	1.10592	3.73615	7.93021	0.14973	0.31656	0.125974	0.385923	1.6323	1.10592	4.24663	7.46981	0.208763	0.917658	0.198396	0.596063	0.810635	2.20578	0.547157	0.131649	0.47	1.16524	2.59826	22.2232	3.7862	4.09573	0.547157	0.131649	0.47	1.16524	2.59826	22.2232
F	77.1425	159.4	74.4344	29.2	N	0	16	11.5	27.5	95	17	3.88868	6.16704	0.110038	0.545415	0.145037	0.869421	0.524392	1.98483	3.88868	6.16704	0.110038	0.545415	0.145037	0.869421	0.524392	1.98483	4.25341	89.2862	0.095838	0.559706	0.220089	0.766935	0.803648	3.29692	0.624229	0.0948705	0.53	1.18122	4.09286	40.3317	7.66419	5.51124	0.624229	0.0948705	0.53	1.18122	4.09286	40.3317
M	84.7616	170.1	82.1332	28.34	N	0	15	12	27	54.38	37	1.36219	3.83323	0.137054	0.306772	0.118847	0.44671	0.539391	1.56769	1.53694	4.20393	0.140761	0.287836	0.115259	0.431839	0.631792	1.60777	4.22109	13.6907	0.199369	0.624789	0.175203	0.610903	0.788164	2.13162	0.605767	0.109503	0.54125	1.12024	3.91896	9.78983	2.30947	5.85163	0.603507	0.1066	0.539	1.12052	3.50802	10.6264
F	71.5342	158.5	78.7496	31.29	N	0	16	12	28	90.63	18	6.87196	9.32734	0.171788	0.417616	0.129863	0.434164	0.565199	1.83593	6.87196	9.32734	0.171788	0.417616	0.129863	0.434164	0.565199	1.83593	1.85529	3.71488	0.195934	0.529215	0.130776	0.537326	0.518841	2.40642	0.58403	0.106649	0.534	1.09391	2.86568	21.8749	1.53855	3.33715	0.58403	0.106649	0.534	1.09391	2.86568	21.8749
M	79.1562	170.3	78.5061	27.14	N	0	15.5	12	27.5	95.63	20	2.98148	5.03054	0.233335	0.352593	0.198812	0.43486	0.424154	0.977977	2.68861	11.3091	0.29703	0.449685	0.214	0.520641	0.434569	1.51346	3.76956	13.1288	0.329527	0.727719	0.314198	0.743146	0.554587	1.82925	0.539451	0.112199	0.592	0.912329	1.97228	22.7281	3.56335	4.62562	0.597077	0.0951216	0.549	1.08983	5.2381	36.0548
F	65.1781	164.4	77.3175	28.49	F	1	16	12	28	76.25	34	3.56881	7.45921	0.149295	0.343712	0.0948707	0.532133	0.592028	2.49218	3.18961	7.96107	0.139489	0.29039	0.0964691	0.581154	0.654495	2.42974	4.58341	7.98244	0.214426	1.19636	0.172836	0.766745	1.62936	4.44935	0.615755	0.0983992	0.52	1.1853	3.22866	21.8737	4.94982	3.20473	0.628817	0.0968934	0.536	1.17329	0.878501	21.9971
M	67.8	174.2	110.362	36.28	N	0	16	12	28	88.75	28	5.96889	4.84553	0.229045	0.457863	0.105994	0.326602	0.416848	1.98688	2.33185	4.00659	0.1586	0.31283	0.133167	0.326483	0.377284	2.1065	3.57783	7.66092	0.258359	0.757335	0.146931	0.516027	0.624764	6.24662	0.562072	0.140588	0.492	1.14308	7.46108	10.2548	3.09918	7.61658	0.565803	0.137634	0.497	1.13935	3.8355	13.6824
F	63.6247	153.6	56.4693	23.78	N	0	16	12	28	83.75	24	2.41843	4.4445	0.202997	0.480355	0.141079	0.47835	0.776572	1.38872	2.41843	4.4445	0.202997	0.480355	0.141079	0.47835	0.776572	1.38872	4.54423	6.60204	0.276703	0.851869	0.161185	0.466882	3.38693	2.25938	0.561177	0.0740417	0.51375	1.0927	2.36013	50.8031	3.31234	1.93687	0.561177	0.0740417	0.51375	1.0927	2.36013	50.8031
F	69.7918	156.3	71.1193	28.98	N	0	16	12	28	70.63	30	2.98434	7.50692	0.106836	0.338998	0.158287	0.419682	0.645945	1.59761	3.07037	4.24053	0.152772	0.555773	0.175594	0.475649	0.736937	1.97998	4.25529	9.51063	0.181979	0.875751	0.193173	0.656928	1.33894	2.10474	0.532149	0.090498	0.546	0.976796	5.18578	33.8064	3.26347	8.62112	0.525049	0.104763	0.47	1.11761	3.3094	10.2365
F	74.0767	150.6	63.3432	27.82	N	0	15	12	27	96.25	18	3.25729	4.209	0.250331	0.567266	0.148666	0.322264	1.09804	2.37989	3.44051	4.82336	0.242958	0.552022	0.141419	0.342922	1.17661	2.32224	2.59357	6.15697	0.317085	1.04474	0.152462	0.282696	1.41101	2.86441	0.575691	0.0763873	0.475	1.21326	3.10283	23.8988	3.06892	5.15983	0.574928	0.0698306	0.4775	1.20542	3.5712	17.9864
F	76.6301	156.6	68.9421	27.93	N	0	16	12	28	98.13	21	1.93011	3.76429	0.123036	0.508429	0.146458	0.674729	0.775067	1.34011	2.76434	1.43597	0.121436	0.623922	0.174423	0.849043	0.689297	1.91935	8.40197	7.34197	0.137583	0.967288	0.176476	1.0442	1.15557	2.32822	0.538955	0.0653396	0.53625	1.00551	2.54346	43.74	3.08069	3.0364	0.597732	0.0677946	0.50875	1.1761	1.79157	19.2209
F	70.7507	157.2	69.4505	27.92	N	0	16	12	28	73.75	32	2.05424	4.2671	0.129826	0.329715	0.268617	0.788799	0.551064	2.17496	2.05424	4.2671	0.129826	0.329715	0.268617	0.788799	0.551064	2.17496	2.9429	5.11599	0.282551	0.794639	0.176941	0.689988	0.477847	2.53947	0.561769	0.0985471	0.532	1.05649	1.62091	15.8437	2.53933	2.99066	0.561769	0.0985471	0.532	1.05649	1.62091	15.8437
M	69.0959	173.5	74.4212	24.65	F	1	16	11	27	88.13	23	4.4139	6.63513	0.140136	0.464918	0.154924	0.472822	1.6863	2.40315	4.4139	6.63513	0.140136	0.464918	0.154924	0.472822	1.6863	2.40315	5.39693	11.2812	0.475742	0.886289	0.159052	0.271872	0.74563	3.60532	0.625607	0.110426	0.529	1.18607	2.97544	10.2105	5.10747	7.49103	0.625607	0.110426	0.529	1.18607	2.97544	10.2105
F	65.2356	163	60.8715	22.81	F	1	15	12	27	96.88	20	5.59548	9.6356	0.105435	0.904127	0.114862	0.977423	0.742275	1.87149	3.69662	6.09344	0.0859483	0.402264	0.126907	0.733388	0.575263	1.04835	7.3062	47.0846	0.161416	1.6823	0.185926	1.38796	1.16666	2.64052	0.646343	0.106844	0.486	1.33384	1.78277	32.9439	5.70037	6.66935	0.586346	0.0793754	0.572	1.02533	1.18121	28.1981
F	71.9534	167.4	93.8333	33.44	N	0	16	12	28	95.63	19	2.66397	3.30799	0.153788	0.308078	0.199626	0.725643	0.494128	2.1869	2.66397	3.30799	0.153788	0.308078	0.199626	0.725643	0.494128	2.1869	2.84843	1.68771	0.41838	0.956952	0.274401	0.963103	2.39925	5.54172	0.537439	0.121417	0.49	1.09862	5.45645	24.6002	2.60154	8.13672	0.537439	0.121417	0.49	1.09862	5.45645	24.6002
F	80.3836	162	68.5815	26.06	N	0	16	12	28	98.13	17	2.14035	4.22963	0.220596	0.589956	0.171025	0.751935	0.679251	2.51209	2.18112	4.18586	0.235777	0.557256	0.167047	0.62209	0.632929	2.39593	2.67106	7.13714	0.316908	1.33	0.224143	0.899203	3.28792	3.07992	0.558941	0.10845	0.492	1.13588	6.43968	7.51409	2.92782	5.24936	0.567399	0.102318	0.493	1.15123	6.6831	9.24172
F	70.1973	169.4	74.6094	25.89	N	0	12.5	11	23.5	75.63	39	2.74793	4.27294	0.137633	0.309799	0.151805	0.494868	0.412244	1.72401	11.1392	5.53041	0.170018	0.577611	0.136721	0.667346	0.72975	1.5564	3.47898	6.68478	0.245852	0.699368	0.141491	0.547066	0.650169	1.89745	0.598247	0.136414	0.738	0.817671	6.1103	19.9083	8.25058	13.4984	0.65193	0.12683	0.604	1.08438	5.40199	15.5026
F	82.6329	155.4	71.2747	29.44	N	0	16	11	27	71.25	27	13.4794	13.0167	0.181461	0.276251	0.187283	0.50251	0.752179	1.87032	1.61212	1.55696	0.145759	0.295288	0.175103	0.519297	1.32589	5.92551	16.8081	8.49344	0.186649	0.271413	0.167016	0.565547	0.748903	2.13973	0.580021	0.0755814	0.668	0.868726	4.01195	27.4393	4.28677	3.21355	0.618683	0.0801038	0.582	1.06648	4.27008	26.5047
F	60.6301	167.1	79.2465	28.29	N	0	16	12	28	56.25	24	1.41791	2.86195	0.133707	0.525862	0.121022	0.545519	0.835179	3.84811	1.41791	2.86195	0.133707	0.525862	0.121022	0.545519	0.835179	3.84811	2.48093	4.75373	0.182	0.971917	0.133315	0.455947	1.85259	13.2669	0.596917	0.0983665	0.513	1.16366	1.76756	17.6616	1.47814	1.63141	0.596917	0.0983665	0.513	1.16366	1.76756	17.6616
M	68.5699	165.6	86.7146	31.47	N	0	16	11	27	81.88	25	2.92719	5.023	0.171354	0.33879	0.130251	0.323315	0.823007	3.17896	2.49362	5.14716	0.183802	0.330305	0.120764	0.325462	0.791289	3.44786	3.53661	4.15109	0.325619	0.977902	0.155995	0.592701	1.98415	4.93154	0.571066	0.145902	0.44625	1.28628	5.58164	28.6712	6.09418	11.3806	0.590333	0.167814	0.4325	1.36912	1.45034	21.6285
F	63.6164	166	68.6645	24.68	N	0	16	12	28	87.5	22	2.6038	2.51717	0.165769	0.754312	0.10827	0.358669	0.899359	2.58372	1.39509	3.34977	0.14471	0.702926	0.102507	0.448981	0.704619	2.33381	5.02944	6.08682	0.263911	1.08578	0.196625	0.315196	1.50559	3.79652	0.67651	0.117877	0.504	1.34262	3.29633	2.61728	2.56789	3.28581	0.648781	0.125119	0.54	1.20265	2.02481	6.12486
F	64.7616	167.6	69.7993	24.71	F	1	16	12	28	95.63	20	2.58566	3.27515	0.219772	0.563648	0.256343	0.652566	1.34792	1.97994	1.80286	1.9802	0.17388	0.545775	0.257989	0.703589	1.04636	1.96513	5.21224	8.87138	0.379748	1.82922	0.186465	1.21944	2.10781	2.22668	0.674942	0.0518139	0.537	1.25875	0.861225	17.7538	4.44594	4.27114	0.661658	0.0675688	0.553	1.20115	3.05121	24.8493
F	74.9507	164.6	78.2184	28.79	F	1	16	10	26	100	16	2.22111	1.91008	0.157863	0.328346	0.124988	0.408326	0.779471	2.08756	1.26415	2.69084	0.227226	0.44427	0.12237	0.375391	0.881456	2.90413	2.1259	0.922451	0.134278	0.278843	0.150407	0.681252	1.22491	2.98811	0.60434	0.110005	0.621667	0.972469	1.45757	35.902	2.02408	2.89771	0.633817	0.182073	0.593	1.07039	3.68156	13.196
F	73.5781	160.4	74.4152	28.84	N	0	16	12	28	88.78	22	2.20871	2.56969	0.171495	0.329098	0.158762	0.466482	0.56968	1.11421	2.14133	1.63183	0.164959	0.420591	0.150873	0.46335	0.679262	1.57789	3.16163	3.07873	0.174459	0.792071	0.143341	0.322401	0.682655	2.23793	0.599108	0.0625045	0.579	1.0358	4.13765	13.0132	2.82477	5.86669	0.607115	0.0786926	0.561	1.0823	3.10421	37.6786
M	75.8767	165.9	73.3313	26.41	F	1	16	12	28	96.88	18	1.46822	1.26308	0.153305	0.196846	0.152368	0.504986	0.81845	3.36507	1.45157	3.96708	0.164946	0.331576	0.156862	0.548184	1.04453	1.82369	2.79772	7.54938	0.240553	0.545676	0.22218	0.53385	3.17052	4.73422	0.522392	0.137683	0.571	0.919436	0.952587	19.4894	8.20037	7.64595	0.554792	0.10485	0.509	1.09317	5.23027	26.8233
F	72.5808	170	67.4674	23.22	F	4	14.5	12	26.5	81.25	26	5.17098	6.8638	0.187794	0.476733	0.189389	0.807713	1.00743	2.08019	5.17098	6.8638	0.187794	0.476733	0.189389	0.807713	1.00743	2.08019	3.41806	8.84933	0.395386	2.20922	0.23918	1.89228	2.08625	2.81926	0.599265	0.0594702	0.525	1.14146	5.32163	52.9463	4.95944e-14	5.32163	0.599265	0.0594702	0.525	1.14146	5.32163	52.9463
M	80.126	167.7	81.7575	28.84	N	0	16	12	28	70.63	28	1.71735	3.93393	0.185492	0.515376	0.203026	0.647681	0.593832	1.9193	2.11344	1.95012	0.142929	0.362408	0.153569	0.567947	0.634439	2.15741	3.67285	5.62671	0.237395	0.88285	0.114949	0.546741	0.907719	2.32336	0.578587	0.119354	0.489	1.18361	0.91747	11.6983	1.82909	2.43754	0.546445	0.128022	0.508	1.07649	3.31695	15.3313
F	62.7836	162.7	104.034	39.33	F	1	16	12	28	75	25	3.31204	6.75556	0.134399	0.501821	0.151653	0.604704	0.511866	2.72002	3.11983	6.38273	0.126349	0.499873	0.155644	0.570052	0.630193	2.84534	5.80968	6.27757	0.284725	1.65806	0.195886	0.989665	0.894584	3.84948	0.56797	0.122155	0.481	1.18084	2.62705	8.00373	1.13872	2.52006	0.560827	0.111143	0.483	1.16129	2.34488	16.864
F	61.589	170.4	75.0312	25.73	N	0	16	12	28	90	27	5.58302	5.47031	0.204671	0.891339	0.174587	0.237246	0.835053	2.23916	2.17751	2.59253	0.300371	0.757912	0.304615	0.28381	0.563507	1.82614	3.86384	3.52002	0.335347	1.11578	0.245781	0.482704	0.53145	2.54333	0.721776	0.0570084	0.509	1.42045	1.54711	21.2617	4.9312	4.56948	0.658551	0.0443989	0.59125	1.11562	0.934145	61.9686
F	66.3452	163	63.4865	23.895	N	0	16	12	28	98.13	17	3.10382	3.1511	0.273459	0.851834	0.171379	0.435689	5.75386	21.1767	3.10382	3.1511	0.273459	0.851834	0.171379	0.435689	5.75386	21.1767	3.4996	8.68988	0.497997	2.12402	0.208874	0.87693	2.27876	3.53768	0.55524	0.0776529	0.499	1.1141	2.17526	39.4375	4.33302	4.22059	0.55524	0.0776529	0.499	1.1141	2.17526	39.4375
M	66.1315	179.3	108.756	33.81	N	0	16	11.5	27.5	100	16	2.65106	4.20929	0.133788	0.31418	0.0904037	0.440987	0.426081	1.71176	1.71344	4.62571	0.195466	0.487239	0.107258	0.438692	0.495615	1.76356	1.73966	6.67387	0.203386	0.548059	0.117353	0.509585	0.625362	2.03495	0.58893	0.183355	0.591	0.998619	1.93542	13.9971	5.33062	5.35287	0.656044	0.169824	0.591	1.11357	2.27127	16.0536
F	71.4986	156.6	67.4679	27.44	N	0	16	12	28	95.63	24	4.7697	7.00814	0.0923824	0.519024	0.127848	0.92539	0.459329	1.61751	4.92273	8.37505	0.10344	0.546728	0.131561	0.926729	0.634528	2.08995	7.02143	12.0926	0.334452	2.21431	0.223955	0.554357	0.895579	2.44289	0.57096	0.10303	0.57	1.00736	4.68771	22.2145	6.62266	10.8721	0.584908	0.104325	0.554	1.06012	3.45121	22.3161
F	66.2438	157.3	84.2009	34.11	N	0	16	12	28	88.75	28	2.0046	1.87875	0.200639	0.345667	0.0956845	0.272337	0.517148	1.19135	2.0046	1.87875	0.200639	0.345667	0.0956845	0.272337	0.517148	1.19135	2.07252	1.84015	0.235567	0.571027	0.0849138	0.268698	0.523549	1.5692	0.589818	0.0793853	0.555	1.06305	2.56899	32.659	1.9111	3.26415	0.589818	0.0793853	0.555	1.06305	2.56899	32.659
F	63.2411	153.3	61.0246	25.83	N	0	16	12	28	82.5	25	2.39353	3.12445	0.211225	0.793121	0.237092	0.795287	0.732082	3.01003	2.58073	2.50886	0.149268	0.459906	0.141182	0.663834	0.967194	3.09253	3.71817	3.0869	0.292882	1.30152	0.241421	0.598987	1.23763	4.02318	0.678755	0.106818	0.461	1.47336	6.06062	26.2809	1.60872	7.11986	0.61348	0.0797845	0.561	1.09655	4.04907	66.1047
F	62.7425	160.5	84.459	32.76	N	0	16	11.5	27.5	78.75	32	3.93703	4.77339	0.140992	0.319754	0.154541	0.5773	0.805333	1.57849	3.93703	4.77339	0.140992	0.319754	0.154541	0.5773	0.805333	1.57849	3.31512	7.61094	0.143276	0.714077	0.182948	1.01919	2.02707	3.52686	0.589678	0.105963	0.55125	1.07063	1.57317	35.8946	3.1746	3.91829	0.589678	0.105963	0.55125	1.07063	1.57317	35.8946
F	68.9945	160.9	88.6484	34.11	N	0	16	12	28	85	22	3.2898	2.70384	0.123458	0.379155	0.127986	0.696129	0.665387	1.9806	3.2898	2.70384	0.123458	0.379155	0.127986	0.696129	0.665387	1.9806	4.40506	4.0204	0.15184	0.962609	0.203165	0.929836	0.674205	2.33063	0.555683	0.120897	0.518	1.0732	1.47328	11.1116	2.22217	2.7864	0.555683	0.120897	0.518	1.0732	1.47328	11.1116
F	70.9479	151.7	66.4921	28.68	F	1	15	11.5	26.5	71.88	25	3.96065	5.67427	0.187163	0.337511	0.180414	0.432161	3.22019	16.8969	6.96156	26.5648	0.194773	0.358804	0.121403	0.43357	1.26955	33.9086	2.93458	3.93995	0.21654	0.531243	0.153558	0.557967	0.92336	2.42616	0.503938	0.0927732	0.5275	0.957762	2.87934	29.081	5.86862	6.50723	0.524616	0.0857583	0.47375	1.11282	6.16086	20.6333
F	65.5671	154.3	76.4417	31.8	N	0	16	12	28	91.25	25	1.47503	3.33814	0.158675	0.298857	0.148155	0.426213	0.352071	1.06285	1.58481	2.55617	0.139457	0.291957	0.0959843	0.465622	0.431136	1.15914	2.93541	3.06637	0.1777	0.565113	0.10626	0.742533	0.626048	2.20979	0.533712	0.0946642	0.552	0.967641	3.1581	9.67835	2.36203	5.00246	0.568006	0.102541	0.549	1.03652	1.59043	18.2652
F	77.1589	155.8	70.2886	28.8	F	1	16	12	28	96.25	17	4.22147	3.30678	0.248043	0.537092	0.131817	0.299667	0.771052	2.5346	2.81516	3.80127	0.202682	0.369298	0.129481	0.344473	0.519081	1.75035	9.05091	6.9776	0.311673	0.868522	0.152751	0.431873	0.669567	3.09767	0.56112	0.0727198	0.473	1.18856	4.87033	28.6943	3.47393	7.6352	0.523752	0.0647015	0.5	1.04835	3.11021	35.1712
F	83.1151	148	67.7316	30.63	N	0	16	12	28	93.75	25	1.57105	4.11156	0.12528	0.292445	0.0733025	0.172687	0.385161	1.24828	2.75248	3.91976	0.165202	0.409022	0.0935435	0.24533	0.49247	1.64115	2.10783	3.96879	0.206888	0.552463	0.13608	0.33268	0.504867	1.15097	0.500637	0.140042	0.505	0.991376	4.22373	17.3107	4.0218	1.508	0.501789	0.130769	0.475	1.05684	2.44631	33.9899
M	75.2795	173.6	91.5866	30.36	N	0	16	12	28	94.38	21	1.42023	1.69661	0.0684528	0.157246	0.0870029	0.27864	0.737503	1.62292	1.64535	4.53032	0.0693499	0.177016	0.0884911	0.262821	0.693471	1.8445	2.59477	4.49103	0.160184	0.883695	0.115652	0.526301	1.54198	3.66337	0.538741	0.145198	0.544	0.991728	3.70715	16.791	3.07596	6.34875	0.56629	0.144869	0.5325	1.06438	4.69278	15.9856
F	66.1753	157.4	56.8335	22.64	N	0	16	12	28	91.25	24	1.78144	5.17659	0.15893	0.318617	0.174119	0.819406	0.701191	2.21176	1.78144	5.17659	0.15893	0.318617	0.174119	0.819406	0.701191	2.21176	4.05111	4.22276	0.22234	0.739595	0.135208	0.61011	1.5993	5.2112	0.551826	0.121867	0.522	1.05721	2.77676	17.5229	1.09212	2.85659	0.551826	0.121867	0.522	1.05721	2.77676	17.5229
F	69.8795	156.2	54.1457	22.05	N	0	16	12	28	79.38	21	1.40535	1.98212	0.152137	0.329824	0.194219	0.607143	1.00738	2.27463	3.72359	4.88789	0.201032	0.426359	0.199471	0.791464	0.924857	2.88777	5.59596	13.3793	0.194368	0.717756	0.218038	0.511841	1.3081	3.64288	0.573629	0.0869275	0.59375	0.967893	3.17942	22.5801	4.58026	6.24791	0.590995	0.0789545	0.543	1.09121	3.13904	14.1987
M	77.137	180	94.6307	29.207	N	0	16	12	28	93.75	17	1.15982	1.52542	0.247857	0.410377	0.185299	0.60378	0.292867	1.50831	1.15982	1.52542	0.247857	0.410377	0.185299	0.60378	0.292867	1.50831	2.61039	3.59388	0.293564	0.552316	0.153491	0.463637	0.698371	2.4616	0.626358	0.127637	0.621	1.00873	4.49886	17.0702	1.74553	4.45996	0.626358	0.127637	0.621	1.00873	4.49886	17.0702
F	61.6658	158.7	60.9662	24.06	F	1	16	12	28	98.13	19	2.90664	7.08696	0.156504	0.620103	0.165695	0.783918	1.10275	1.73865	2.90664	7.08696	0.156504	0.620103	0.165695	0.783918	1.10275	1.73865	3.50514	5.99816	0.231028	1.61972	0.186814	1.35957	2.05587	4.33746	0.575534	0.0899741	0.51	1.13013	1.69759	16.2238	3.75462	5.20099	0.575534	0.0899741	0.51	1.13013	1.69759	16.2238
M	70.5726	171.1	89.6718	30.57	N	0	16	11.5	27.5	97.5	18	2.02738	2.75852	0.256304	0.493931	0.139845	0.520562	0.40192	3.27104	2.64534	2.15683	0.246273	0.484398	0.0943006	0.290138	0.352285	2.15347	3.93105	9.92735	0.382571	0.884586	0.115387	0.332047	1.101	4.20657	0.652065	0.172468	0.512	1.27481	4.29055	6.97191	2.24822	6.16766	0.659818	0.176129	0.56	1.17963	1.83271	9.93845
F	65.726	167.8	76.6978	27.2	F	2	16	12	28	64.38	32	2.19794	6.93225	0.138953	0.345514	0.175479	0.660325	0.484772	2.27963	2.19794	6.93225	0.138953	0.345514	0.175479	0.660325	0.484772	2.27963	1.98237	5.78849	0.171627	0.870386	0.178655	1.04402	0.610162	2.80401	0.54444	0.0898751	0.529	1.02948	2.45792	31.187	1.23236	3.40396	0.54444	0.0898751	0.529	1.02948	2.45792	31.187
F	76.5397	163.2	66.1912	24.71	N	0	14.5	12	26.5	75	31	4.09796	6.55062	0.164258	0.295442	0.120014	0.526755	0.752775	1.87786	4.09796	6.55062	0.164258	0.295442	0.120014	0.526755	0.752775	1.87786	2.82569	3.12621	0.199485	0.562718	0.109184	0.62846	1.01892	2.52229	0.57394	0.0576028	0.569	1.01036	2.19224	58.7228	5.06322	4.58572	0.57394	0.0576028	0.569	1.01036	2.19224	58.7228
F	67.1562	158.7	85.9831	34.03	F	1	16	11	27	83.13	22	3.57071	5.43666	0.0952352	0.350173	0.123151	0.338469	0.880445	2.93368	3.57071	5.43666	0.0952352	0.350173	0.123151	0.338469	0.880445	2.93368	4.14426	6.62964	0.175933	1.42443	0.24297	0.937209	1.55349	5.29364	0.564294	0.088024	0.50125	1.13238	4.00828	19.4067	6.83249	11.4376	0.564294	0.088024	0.50125	1.13238	4.00828	19.4067
M	73.2959	164.3	72.4242	26.75	N	0	16	12	28	95	20	2.4958	2.23706	0.214712	0.47461	0.192992	0.355945	1.05344	2.39469	2.4958	2.23706	0.214712	0.47461	0.192992	0.355945	1.05344	2.39469	2.14268	4.57958	0.322276	0.996172	0.126785	0.340311	0.699045	5.29059	0.611073	0.104668	0.606	1.00838	2.89855	16.0232	1.58708	2.46156	0.611073	0.104668	0.606	1.00838	2.89855	16.0232
F	64.0055	165.2	97.9667	35.84	N	0	16	12	28	90	19	1.87832	4.24052	0.186355	0.353843	0.0823805	0.316156	0.496551	2.59718	1.40569	3.99175	0.10591	0.230141	0.109791	0.328869	0.421347	1.66483	2.57195	6.43189	0.20589	0.7934	0.0980832	0.57159	1.11657	2.15157	0.632052	0.123203	0.494	1.28075	2.55852	9.41579	3.15231	4.68766	0.601034	0.141994	0.579	1.03912	2.31272	10.4487
F	71.3205	162.7	89.9565	33.92	F	2	16	11.5	27.5	80.63	25	1.91912	3.06731	0.0820002	0.305177	0.110452	0.356551	0.286633	1.10947	4.28842	5.25824	0.090172	0.399952	0.100383	0.423682	5.51518	11.3595	3.12745	2.60245	0.160392	0.491376	0.089326	0.413386	0.611284	2.48322	0.492317	0.0918956	0.595	0.827775	3.90743	31.9284	3.41346	3.80964	0.523423	0.116272	0.53375	0.984326	3.85891	29.3062
F	69.6932	156.6	84.0044	34.13	N	0	15.5	12	27.5	100	18	2.15641	3.67823	0.146439	0.348806	0.210826	0.781396	0.328473	1.59396	2.15641	3.67823	0.146439	0.348806	0.210826	0.781396	0.328473	1.59396	3.12684	5.84494	0.212331	0.895021	0.135934	0.941596	0.528573	2.28095	0.567868	0.0968142	0.532	1.07042	3.82102	20.6636	5.34146	7.37668	0.567868	0.0968142	0.532	1.07042	3.82102	20.6636
F	76.3233	153.8	86.1134	36.36	N	0	16	12	28	55	48	2.50647	2.3226	0.123069	0.415268	0.175531	0.274401	0.620002	1.09688	3.36895	5.23603	0.191701	0.527514	0.0837733	0.34383	0.985665	2.41478	3.36895	5.23603	0.191701	0.527514	0.0837733	0.34383	0.985665	2.41478	0.49138	0.133181	0.525	0.941675	2.125	18.5275	12.1218	10.0097	0.565752	0.125956	0.505	1.12081	2.12996	20.7743
F	74.5808	162.9	61.4473	23.02	N	0	16	11	27	88.75	19	1.84715	3.15622	0.180651	0.393066	0.191243	0.825601	0.874454	1.51299	1.84715	3.15622	0.180651	0.393066	0.191243	0.825601	0.874454	1.51299	4.93923	8.86992	0.188454	0.748323	0.191842	1.14013	0.794724	1.78218	0.616823	0.0613375	0.526	1.17322	2.78387	16.1729	1.82846	3.9838	0.616823	0.0613375	0.526	1.17322	2.78387	16.1729
F	74.6466	151.2	61.5184	26.86	N	0	16	12	28	95.63	20	3.32419	7.90168	0.120782	0.28803	0.0981702	0.577039	0.391663	1.29808	4.14905	5.97029	0.126808	0.441597	0.172135	0.726235	3.40502	4.31755	1.32833	1.65397	0.12482	0.823165	0.100818	0.612788	0.980742	2.09397	0.531701	0.131062	0.565	0.941679	2.39588	16.1891	2.42355	4.0119	0.57912	0.113518	0.526	1.1014	5.9077	22.029
F	67.7288	161.5	66.5845	25.42	N	0	16	12	28	95	19	2.50788	4.8182	0.155013	0.652269	0.186132	0.809749	0.884465	2.1062	1.86498	2.41616	0.18738	0.39189	0.155381	0.464191	1.18344	1.2796	2.0915	4.0382	0.171199	1.07865	0.218897	1.08168	1.71523	1.18046	0.664467	0.0752927	0.516	1.28778	2.9876	24.8413	2.10073	2.32142	0.627605	0.0520166	0.566	1.11112	2.64994	32.7747
F	68.1616	163.5	89.7895	33.55	N	0	16	12	28	90.63	21	5.8486	8.97155	0.135092	0.49198	0.127346	0.602319	0.765689	1.25524	2.68707	4.08255	0.125695	0.37501	0.13235	0.327619	0.441382	1.10139	3.50739	8.97644	0.215268	0.708341	0.17251	0.822911	0.674319	1.61498	0.613523	0.0791932	0.48	1.27911	2.38975	40.0969	2.32924	4.28687	0.562674	0.0758534	0.527	1.06816	5.5603	19.2054
F	74.5753	153.8	77.5846	32.72	N	0	15.5	12	27.5	88.75	21	1.48267	2.93114	0.145386	0.46557	0.152573	0.533339	0.483164	2.43104	3.7386	13.6374	0.144397	0.586803	0.176421	0.835251	0.743089	2.52097	4.69607	4.79935	0.201028	1.14255	0.128403	0.909022	0.650899	3.09495	0.532246	0.139325	0.54625	0.974546	4.98903	22.6514	5.46012	0.485522	0.556365	0.135624	0.468	1.19141	3.80805	32.5311
F	65.5836	166.3	93.356	33.77	N	0	16	12	28	93.75	21	1.91637	3.6963	0.122758	0.814763	0.112462	0.922341	1.78338	4.23035	1.78857	3.72018	0.0912646	0.612395	0.114435	0.850698	1.43012	1.68358	3.37912	7.69874	0.161811	1.25277	0.130485	0.843846	2.05325	3.29965	0.611779	0.105498	0.513	1.19329	2.32308	23.3331	2.24383	3.99248	0.591221	0.1077	0.553	1.07026	1.57783	32.3942
F	67.6247	157.7	86.8479	34.86	N	0	16	12	28	93.75	20	1.58508	1.93232	0.260654	0.587335	0.136242	0.607888	0.694683	3.62243	2.68066	4.67221	0.136164	0.364064	0.229248	0.792579	0.884322	2.05202	2.69197	4.78012	0.270336	0.998415	0.151477	0.964196	0.709803	3.90709	0.644805	0.102336	0.449	1.43742	3.61277	17.8296	2.98806	5.2198	0.571389	0.103525	0.508	1.12748	1.62683	21.1538
F	85.4712	153.7	78.2246	33.1	N	0	16	12	28	95.63	18	2.29193	4.02147	0.137857	0.333257	0.142774	0.446347	2.24335	2.52236	2.29193	4.02147	0.137857	0.333257	0.142774	0.446347	2.24335	2.52236	3.26162	12.9422	0.218171	0.454192	0.203254	0.632215	0.69644	1.17266	0.537478	0.0827483	0.442	1.21719	1.66353	35.3419	3.6305	3.72955	0.537478	0.0827483	0.442	1.21719	1.66353	35.3419
F	68.2027	156.9	97.6264	39.65	N	0	16	12	28	96.25	18	1.29	3.03014	0.119266	0.257358	0.0775013	0.333903	0.451523	1.61293	0.849906	2.16033	0.131666	0.248337	0.0714582	0.28532	0.476175	1.75137	1.8433	2.75133	0.124978	0.394008	0.11018	0.340393	0.535458	1.70318	0.520912	0.142812	0.539	0.966851	1.0653	12.849	2.40115	2.42569	0.519681	0.156306	0.475	1.0953	2.54629	7.84502
F	66.9671	160.3	61.0525	23.58	N	0	16	12	28	98.75	17	4.5825	2.62984	0.163597	0.682634	0.200292	0.950903	0.915408	2.89914	2.59772	1.16903	0.130707	0.553415	0.153243	0.689494	0.651126	2.20927	2.35609	6.05469	0.221193	0.862006	0.260391	0.805742	0.690033	2.28734	0.646384	0.0805168	0.478	1.35219	2.72088	27.044	0.572932	2.38743	0.594453	0.0639455	0.543	1.09936	4.63263	61.7797
[truncated: 10 more columns]

## Sheet: Notes
Variable	Description
ABC	The Activities-specific Balance Confidence Scale
FES	The Falls Efficacy Scale-International
w_self-selected	walking at self-selected speed
w_defined	walking at defined speed
w_fast	walking at fast speed
SD	standard deviation of centre of pressure displacement
AP	anterior-posterior direction
ML	medial-lateral direction
LR	loading response
MSt	midstance
TSt	terminal stance
PSw	Preswing
CV	coefficient of variation
